# Supplementary material for: Highly-sensitive label-free immunosensor for tumor necrosis factor α based on Ag@Pt core–shell nanoparticles supported on MWCNTs as an efficient electrocatalyst nanocomposite
Source: Royal Society of Chemistry journal article supplement (doi:10.1039/c5ra08016a), 2015-01-01
Supplement: c5ra08016a1.pdf [file c5ra08016a1.pdf]

## Supporting information

### **Highly-sensitive label-free immunosensor for tumor necrosis factor $\alpha$ based on Ag@Pt core-shell nanoparticles supported on MWCNT as efficient electrocatalyst nanocomposite**

**Mohammad Mazloum-Ardakani\*, Laleh Hosseinzadeh**

Department of Chemistry, Faculty of Science, Yazd University, Yazd, 89195-741, Iran

E-Mail: [mazloum@yazduni.ac.ir](mailto:mazloum@yazduni.ac.ir)

Phone No: 00983518211670

Fax No: 00983518210644

**Fig. S1**

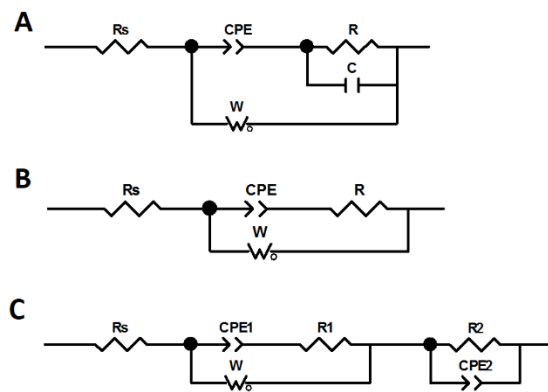

**Fig.S1** Equivalent circuits that fit with obtained EIS spectra.

**Fig. S2**

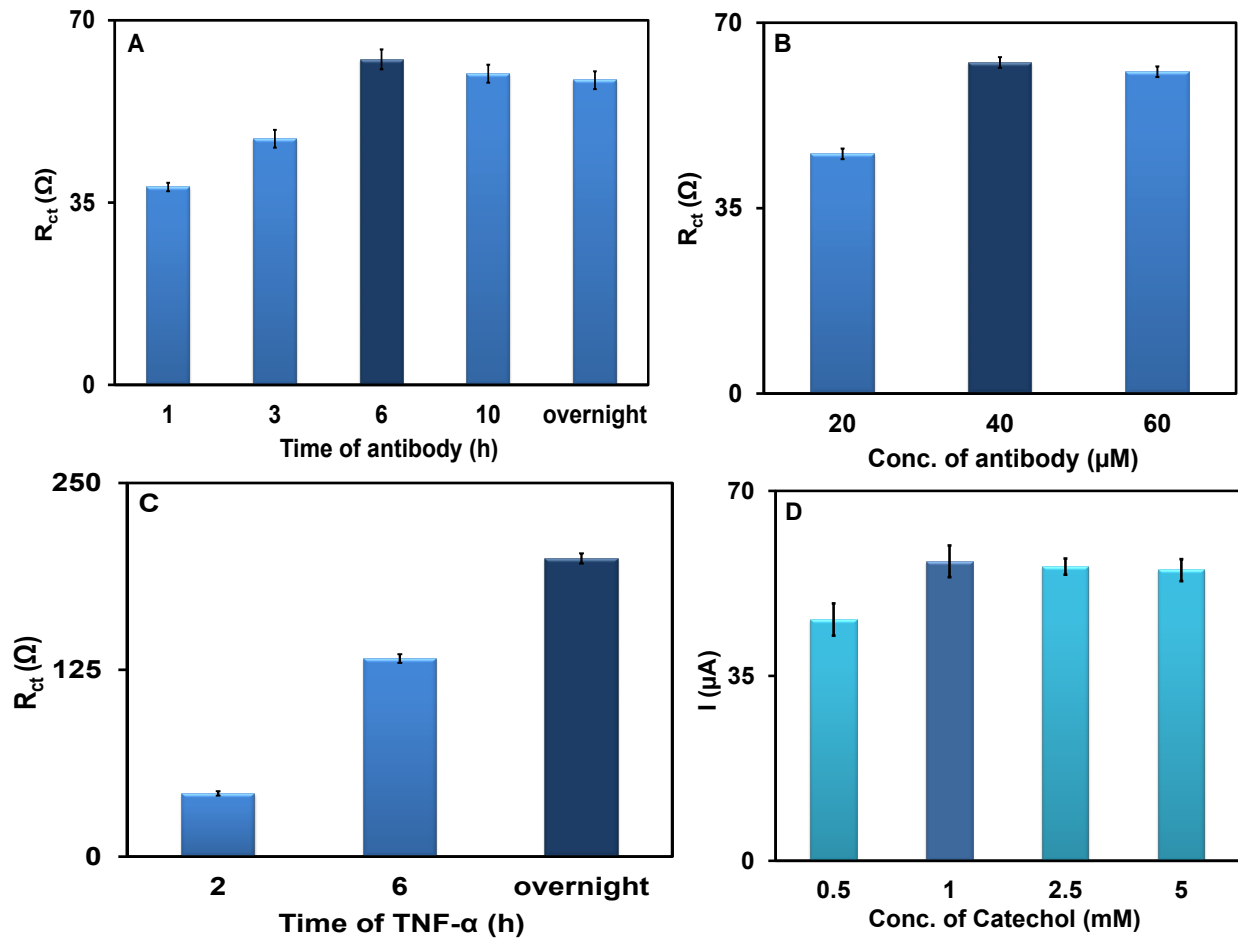

**Fig. S2** Optimization of: (A) incubation time and (B) the concentration of antibody, (C) incubation time of TNF- $\alpha$  protein. EIS responses were performed in 10 mM  $[Fe(CN)_6]^{3-/4-}$  in 0.1 M PBS (pH 7.4). (D) Optimization of catechol concentration. CV responses of the sensor at different concentration of catechol in 0.1 M PBS (pH 7.4). The values reported in the figures represent the mean value of 6 different measurements.

**Table S1.**Table S1. Characteristics of different TNF- $\alpha$  immunosensors reported in the literature.

| Technique              | Method                                                                     | LOD<br>( $\mu\text{g mL}^{-1}$ ) | Precision, RSD<br>% | Samples     | Ref.      |
|------------------------|----------------------------------------------------------------------------|----------------------------------|---------------------|-------------|-----------|
| Impedance spectroscopy | Capacitor arrays                                                           | 25                               | -                   | -           | [1]       |
| Electrochemistry       | surface-initiated atom transfer radical polymerization                     | 3.9                              | -                   | -           | [2]       |
| Electrochemistry       | Ferrocene carboxylic acid functionalized self-assembled peptide nanowire   | 2                                | 5.4                 | Human serum | [3]       |
| Electrochemistry       | Alkaline phosphatase functionalized nanospheres                            | 10                               | 5.7                 | Human serum | [4]       |
| Electrochemistry       | Aptasensor, methylene blue labelling                                       | 10000                            | -                   | Human blood | [5]       |
| Electrochemistry       | Conductive polymer MBs acustical amplification under magnetic field        | 3.2                              | 3.4                 | Human serum | [6]       |
| QCM                    |                                                                            | 25000                            |                     | -           | [7]       |
| SPR                    | Gold nanoparticle enhancement                                              | 11.6                             | -                   | Human serum | [8]       |
| Electrochemistry       | bimetallic Ag@Pt core-shell nanoparticles supported on MWCNTs and chitosan | 1.6                              | 2.2                 | Human serum | This work |

## References

- [1] A. Qureshi, J.H. Niazi, S. Kallempudi, Y. Gurbuz, Label-free capacitive biosensor for sensitive detection of multiple biomarkers using gold interdigitated capacitor arrays., *Biosens. Bioelectron.* 25 (2010) 2318–23.
- [2] L. Yuan, W. Wei, S. Liu, Label-free electrochemical immunosensors based on surface-initiated atom radical polymerization, *Biosens. Bioelectron.* 38 (2012) 79–85.
- [3] Z. Sun, L. Deng, H. Gan, R. Shen, M. Yang, Y. Zhang, Sensitive immunosensor for tumor necrosis factor  $\alpha$  based on dual signal amplification of ferrocene modified self-assembled peptide nanowire and glucose oxidase functionalized gold nanorod., *Biosens. Bioelectron.* 39 (2013) 215–9.
- [4] Z. Yin, Y. Liu, L.-P. Jiang, J.-J. Zhu, Electrochemical immunosensor of tumor necrosis factor  $\alpha$  based on alkaline phosphatase functionalized nanospheres., *Biosens. Bioelectron.* 26 (2011) 1890–4.
- [5] Y. Liu, Q. Zhou, A. Revzin, An aptasensor for electrochemical detection of tumor necrosis factor in human blood, *Analyst.* 138 (2013) 4321–4326.
- [6] M. Mazloum-Ardakani, L. Hosseinzadeh, Z. Taleat, Two kinds of electrochemical immunoassays for the tumor necrosis factor  $\alpha$  in human serum using screen-printed graphite electrodes modified with poly (anthranilic acid), *Microchim. Acta.* (2014) 1–8.
- [7] Y.K. Bahk, H.H. Kim, D. Park, S. Chang, J.S. Go, A New Concept for Efficient Sensitivity Amplification of a QCM Based Immunosensor for TNF-  $\alpha$  by Using Modified Magnetic Particles under Applied Magnetic Field, 32 (2011) 4215–4220.
- [8] J. Martinez-Perdiguero, A. Retolaza, L. Bujanda, S. Merino, Surface plasmon resonance immunoassay for the detection of the TNF $\alpha$  biomarker in human serum, *Talanta.* 119 (2014) 492–497.
